# Supplementary material for: Migration of ferrofluid droplets in shear flow under a uniform magnetic field
Source: Royal Society of Chemistry journal article supplement (doi:10.1039/c8sm02522c), 2019-01-01
Supplement: c8sm02522c11.pdf [file c8sm02522c11.pdf]

# Migration of ferrofluid droplets in shear flow under a uniform magnetic field

Jie Zhang<sup>a</sup>, Md. Rifat Hassan<sup>a</sup>, Bhargav Rallabandi<sup>b</sup>, and Cheng Wang<sup>\*a</sup>

<sup>a</sup>Department of Mechanical and Aerospace Engineering, Missouri University of Science and Technology, 400 W. 13th St., Rolla, Missouri, 65409, USA

<sup>b</sup>Department of Mechanical Engineering, University of California, Riverside, California 92521, USA.

## 1. Design of microfluidic chip

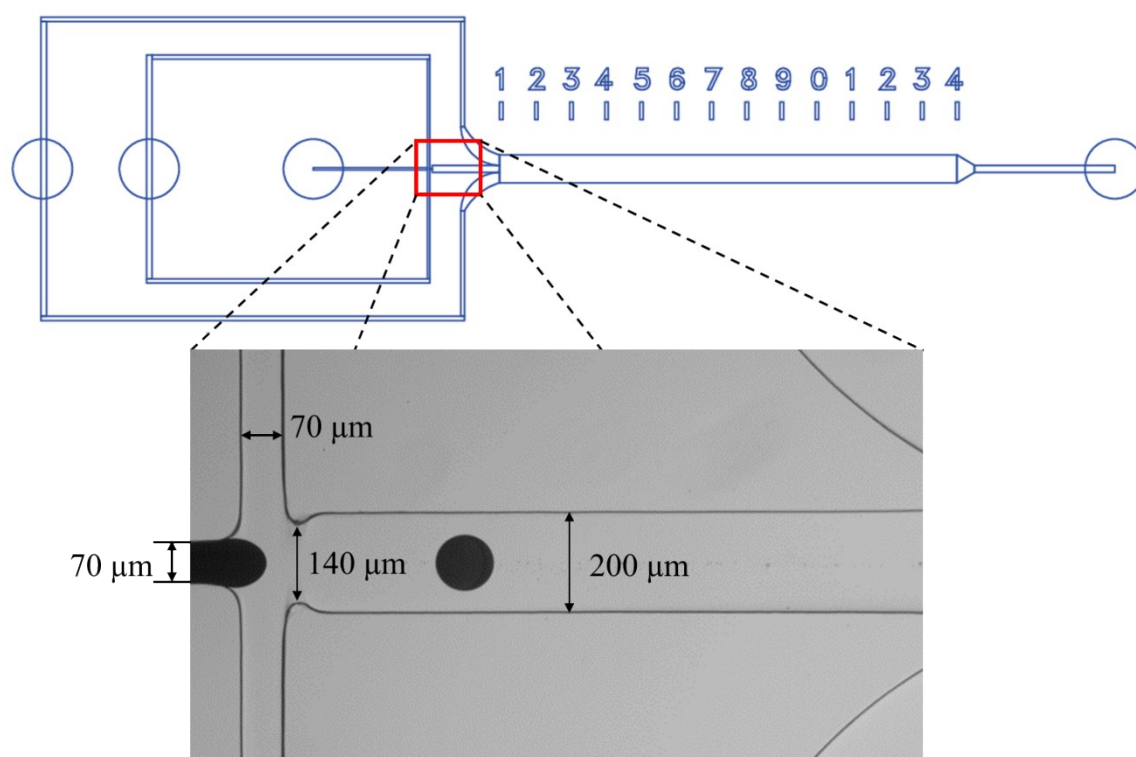

Figure: CAD design of Microfluidic chip and photo of flow-focusing configuration
